# Supplementary material for: Exploring cold quarantine to mango fruit against fruit fly using artificial ripening
Source: PubMed Central journal article supplement (PMC6374360; doi:10.1038/s41598-019-38521-x), 2019-02-13
Supplement: 41598_2019_38521_MOESM1_ESM.pdf [file 41598_2019_38521_MOESM1_ESM.pdf]

# Exploring cold quarantine to mango fruit against fruit fly using artificial ripening

Abhinandan S. Patil\*, Dalia Maurer\*, Oleg Feygenberg & Noam Alkan

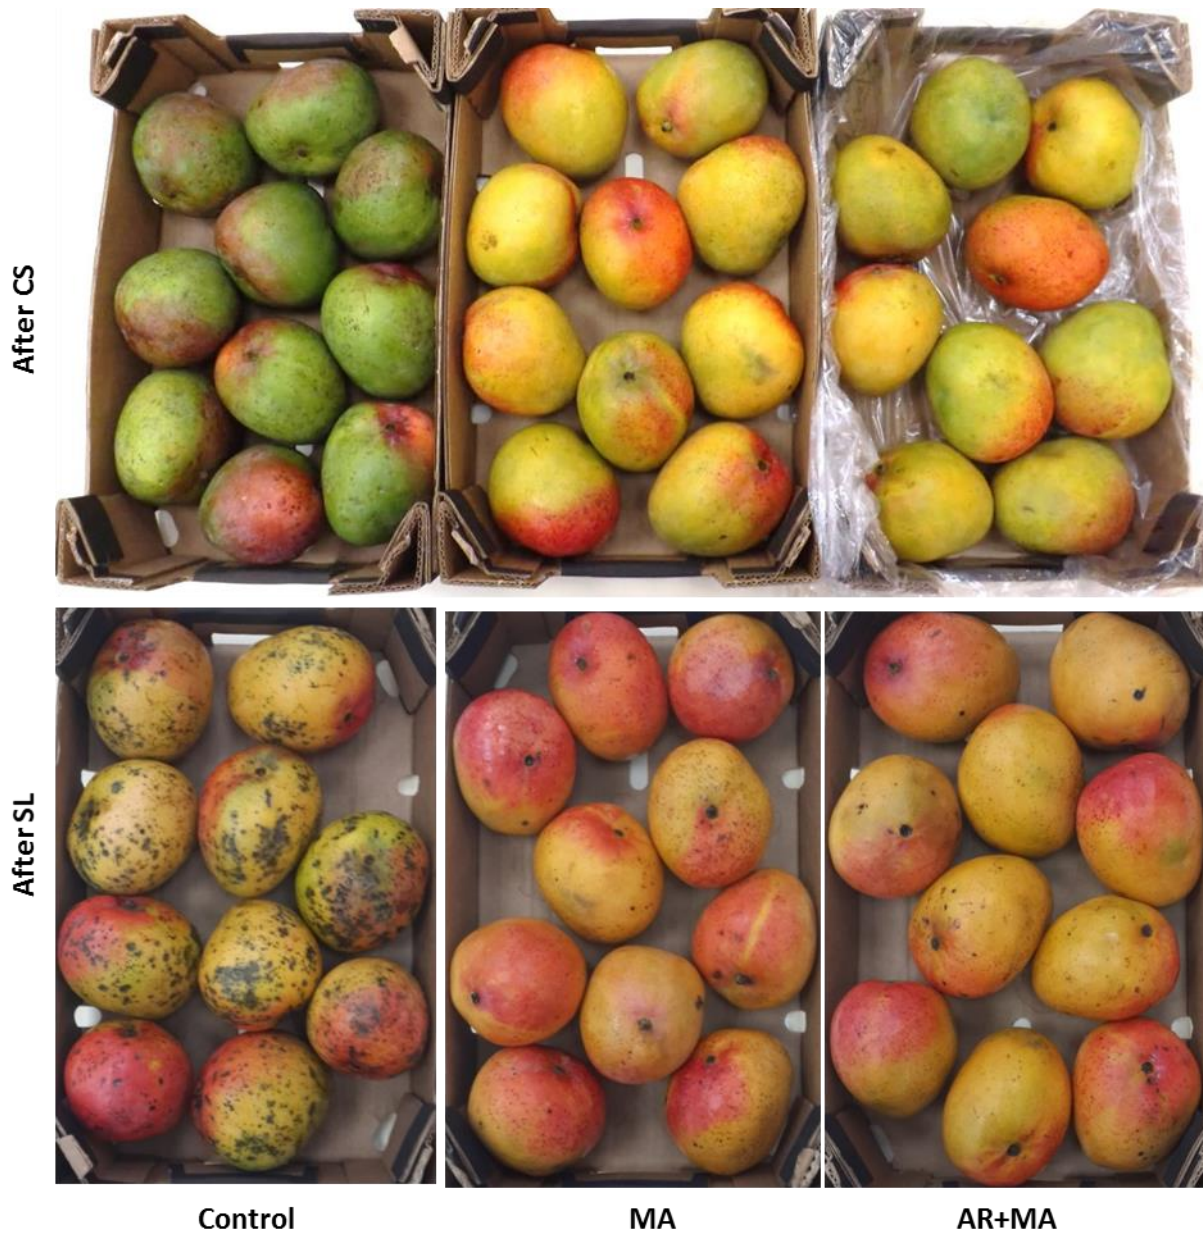

**Supplementary Fig. S1.** Representative pictures of boxes of 'Shelly' mango fruit after cold storage (CS) (upper panel) and an additional 4 days of shelf life (SL) (lower panel) for control, modified atmosphere (MA) and the combination of artificial ripening and modified atmosphere (AR+MA).

# Exploring cold quarantine to mango fruit against fruit fly using artificial ripening

Abhinandan S. Patil\*, Dalia Maurer\*, Oleg Feygenberg & Noam Alkan

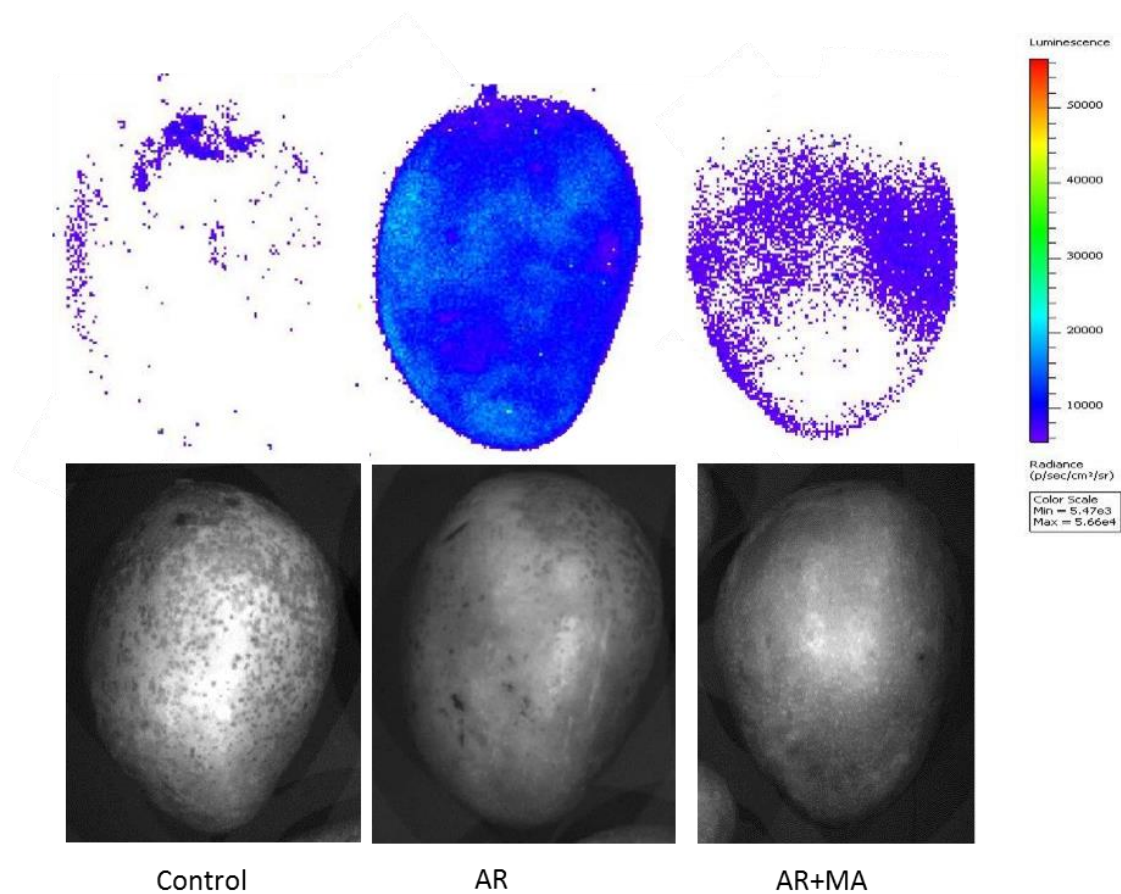

**Supplementary Fig. S2.** Lipid peroxidation and luminescence after cold quarantine (19 days at 2°C) of mango fruits of cultivar Keitt in the year 2017. Luminescence over 600 nm indicates lipid peroxidation for artificial ripening (AR: middle upper panel) treatments and combined with modified atmosphere (AR+MA: right upper panel) and Control (left upper panel). Black and white pictures of the same fruits are presented at the lower panel.

# Exploring cold quarantine to mango fruit against fruit fly using artificial ripening

Abhinandan S. Patil\*, Dalia Maurer\*, Oleg Feygenberg & Noam Alkan

**Supplementary info S1.** Fruit volatiles characterized by GC-MS analysis in the peel of control fruit or in the artificial ripening (AR) treatments or combined with modified atmosphere (MA). Presented are the average and standard deviation of the volatiles in ng/g FW.

| R.T.                 | ng/g FW                                     |                       | Control     |     | AR          |     | AR+MA       |     |
|----------------------|---------------------------------------------|-----------------------|-------------|-----|-------------|-----|-------------|-----|
|                      |                                             |                       | AVG         | Std | AVG         | Std | AVG         | Std |
| 11.202               | cis-3-Hexenyl Acetate                       |                       | <b>910</b>  | 910 | <b>110</b>  | 56  | <b>30</b>   | 30  |
| 2.399                | Ethyl Acetate                               |                       | <b>0</b>    | 0   | <b>48</b>   | 48  | <b>0</b>    | 0   |
| 1.604                | Acetaldehyde                                |                       | <b>87</b>   | 0   | <b>48</b>   | 25  | <b>40</b>   | 20  |
| 3.269                | Pentanal                                    | Valeral               | <b>312</b>  | 40  | <b>272</b>  | 17  | <b>268</b>  | 28  |
| 5.177                | Hexanal                                     |                       | <b>435</b>  | 134 | <b>418</b>  | 78  | <b>268</b>  | 50  |
| 6.52                 | 2-Hexenal                                   |                       | <b>589</b>  | 240 | <b>580</b>  | 93  | <b>1092</b> | 490 |
| 14.307               | Nonanal                                     |                       | <b>173</b>  | 8   | <b>44</b>   | 44  | <b>0</b>    | 0   |
| <b>Alcohols</b>      |                                             |                       |             |     |             |     |             |     |
| 1.703                | Ethanol                                     |                       | <b>84</b>   | 15  | <b>12</b>   | 12  | <b>0</b>    | 0   |
| 3.077                | Ethyl vinyl carbinol                        |                       | <b>4</b>    | 2   | <b>3</b>    | 3   | <b>0</b>    | 0   |
| 4.479                | 1-Pentanol                                  | Amyl alcohol          | <b>10</b>   | 1   | <b>11</b>   | 1   | <b>7</b>    | 0   |
| 6.615                | 3-Hexen-1-ol                                | cis-3-Hexenol         | <b>208</b>  | 75  | <b>196</b>  | 31  | <b>217</b>  | 31  |
| 6.974                | Isohexanol                                  |                       | <b>24</b>   | 1   | <b>12</b>   | 6   | <b>7</b>    | 7   |
| <b>MonoTerpene</b>   |                                             |                       |             |     |             |     |             |     |
| 8.933                | 1R- $\alpha$ -Pinene                        |                       | <b>25</b>   | 8   | <b>26</b>   | 17  | <b>43</b>   | 13  |
| 10.736               | Myrcene                                     | $\alpha$ -Myrcene     | <b>0</b>    | 0   | <b>0</b>    | 0   | <b>0</b>    | 0   |
| 10.752               | $\beta$ -Pinene                             |                       | <b>73</b>   | 47  | <b>91</b>   | 56  | <b>189</b>  | 110 |
| 11.188               | $\alpha$ -Phellandrene                      |                       | <b>13</b>   | 13  | <b>8</b>    | 8   | <b>15</b>   | 8   |
| 11.369               | 1R- $\alpha$ -Pinene                        |                       | <b>0</b>    | 0   | <b>102</b>  | 102 | <b>0</b>    | 0   |
| 11.532               | Cyclofenchene                               | 3-Carene              | <b>1432</b> | 568 | <b>1506</b> | 858 | <b>2443</b> | 698 |
| 11.607               | $\alpha$ -Terpinen                          |                       | <b>5</b>    | 5   | <b>12</b>   | 7   | <b>21</b>   | 11  |
| 11.826               | o-Isopropyltoluene                          | <i>p</i> -Cymene      | <b>9</b>    | 9   | <b>18</b>   | 10  | <b>31</b>   | 12  |
| 11.971               | Limonene                                    |                       | <b>63</b>   | 39  | <b>87</b>   | 50  | <b>149</b>  | 69  |
| 12.555               | $\beta$ -cis-Ocimene                        |                       | <b>0</b>    | 0   | <b>0</b>    | 0   | <b>3</b>    | 3   |
| 12.917               | Gamma terpinene                             |                       | <b>0</b>    | 0   | <b>0</b>    | 0   | <b>4</b>    | 4   |
| 13.796               | $\delta$ -Terpinolen                        | Terpinolen            | <b>5</b>    | 5   | <b>11</b>   | 6   | <b>20</b>   | 10  |
| 13.873               | $\delta$ -Terpinolen                        | Terpinolen            | <b>52</b>   | 38  | <b>87</b>   | 50  | <b>169</b>  | 92  |
|                      | Terpinolen                                  |                       | <b>57</b>   | 43  | <b>98</b>   | 56  | <b>189</b>  | 102 |
| 18.934               | Verbenone                                   |                       | <b>0</b>    | 0   | <b>0</b>    | 0   | <b>3</b>    | 3   |
| <b>SesquiTerpene</b> |                                             |                       |             |     |             |     |             |     |
| 22.605               | Copaene                                     |                       | <b>6</b>    | 6   | <b>0</b>    | 0   | <b>6</b>    | 6   |
| 23.94                | Caryophyllene                               | $\beta$ -Caryophyllen | <b>895</b>  | 337 | <b>282</b>  | 124 | <b>1041</b> | 704 |
| 24.084               | Undecane, 10,10-dimethyl-2,6-bis(methylene) |                       | <b>8</b>    | 8   | <b>0</b>    | 0   | <b>12</b>   | 12  |
| 23.58                | $\alpha$ -Gurjunene                         |                       | <b>29</b>   | 3   | <b>19</b>   | 10  | <b>41</b>   | 21  |
| 24.694               | 11-Trimethyl-8-methylenebicyclo             |                       | <b>0</b>    | 0   | <b>0</b>    | 0   | <b>6</b>    | 6   |
| 24.823               | $\alpha$ -Caryophyllene                     | Humulene              | <b>424</b>  | 175 | <b>135</b>  | 60  | <b>572</b>  | 413 |
| 25.191               | Longifolene-(V4)                            |                       | <b>0</b>    | 0   | <b>0</b>    | 0   | <b>11</b>   | 11  |
| 25.672               | $\beta$ -Selinene                           |                       | <b>81</b>   | 28  | <b>25</b>   | 13  | <b>127</b>  | 102 |
| 25.845               | Eremophilene                                |                       | <b>0</b>    | 0   | <b>0</b>    | 0   | <b>8</b>    | 8   |
| 25.904               | $\alpha$ -Selinene                          |                       | <b>8</b>    | 8   | <b>0</b>    | 0   | <b>19</b>   | 19  |

# Exploring cold quarantine to mango fruit against fruit fly using artificial ripening

Abhinandan S. Patil\*, Dalia Maurer\*, Oleg Feygenberg & Noam Alkan

Supplementary info S2. Transcript abbreviations and expression values adapted from Sivankalyani et al. (2016).

| Ethylene biosynthesis                  |                   |                                                                            | KEGG IDs | Harvest (RPKM) | 2d_5t (RPKM) | 2d_12t (RPKM) | 7d_5t1 (RPKM) | 7d_12t (RPKM) | 14d_5t (RPKM) | 14d_12t (RPKM) |
|----------------------------------------|-------------------|----------------------------------------------------------------------------|----------|----------------|--------------|---------------|---------------|---------------|---------------|----------------|
| metK 2                                 | comp5215_c0_seq1  | metk2 elaum ame: s-adenosylmethionine synthase                             | K00789   | 232.8365       | 296.298      | 75.364        | 618.186       | 58.493        | 419.587       | 126.8595       |
| speD i                                 | comp20645_c0_seq1 | s-adenosylmethionine synthetase                                            | K00789   | 12.5405        | 43.4405      | 3.253         | 35.1125       | 5.6145        | 18.2805       | 4.1575         |
| speD ii                                | comp20254_c0_seq1 | s-adenosylmethionine synthase 2                                            | K00789   | 24.623         | 54.727       | 4.3225        | 46.1605       | 6.3795        | 19.954        | 7.565          |
| speD iii                               | comp20931_c0_seq1 | s-adenosylmethionine synthase-like protein                                 | K00789   | 117.931        | 169.1275     | 96.0145       | 105.2605      | 50.03         | 89.048        | 34.644         |
| ACS i                                  | comp19011_c0_seq1 | s-adenosylmethionine decarboxylase proenzyme                               | K01611   | 10.254         | 37.9145      | 6.6675        | 35.548        | 6.782         | 57.3445       | 8.257          |
| ACS ii                                 | comp19531_c0_seq1 | af512545_1s-adenosylmethionine decarboxylase                               | K01611   | 306.303        | 1061.127     | 303.2945      | 570.0195      | 151.2275      | 590.202       | 195.131        |
| ACO                                    | comp19468_c0_seq1 | 1-aminocyclopropane-1-carboxylate oxidase                                  | K05933   | 1210.499       | 2745.828     | 180.1395      | 722.8195      | 38.256        | 172.469       | 290.031        |
| Ethylene signal trasduction            |                   |                                                                            | KEGG IDs | Harvest (RPKM) | 2d_5t (RPKM) | 2d_12t (RPKM) | 7d_5t1 (RPKM) | 7d_12t (RPKM) | 14d_5t (RPKM) | 14d_12t (RPKM) |
| EIN 3 i                                | comp17311_c0_seq1 | ethylene-insensitive 3d                                                    | K14514   | 148.791        | 368.66       | 81.611        | 113.3475      | 57.556        | 68.1985       | 58.752         |
| EIN 3 ii                               | comp19306_c0_seq1 | ethylene-insensitive 3b                                                    | K14514   | 73.023         | 166.004      | 37.085        | 68.2755       | 30.7595       | 46.75         | 38.463         |
| EIN 3 iii                              | comp19306_c0_seq2 | ethylene-insensitive 3b                                                    | K14514   | 100.159        | 198.252      | 52.9865       | 82.4785       | 43.233        | 51.3815       | 47.5815        |
| ERF 1                                  | comp6324_c0_seq1  | ethylene-responsive transcription factor                                   | K14516   | 3.9695         | 71.5925      | 2.55          | 27.4395       | 1.3875        | 9.7835        | 19.125         |
| ERF 2 i                                | comp14120_c0_seq1 | ethylene-responsive transcription factor erf061                            | K09286   | 7.4305         | 80.523       | 4.1265        | 26.55         | 7.27          | 8.1655        | 13.998         |
| ERF 2 ii                               | comp15477_c0_seq1 | ethylene-responsive transcription factor wri1                              | K09285   | 5.233          | 11.0085      | 5.0215        | 36.7835       | 9.8875        | 17.6          | 22.2545        |
| ERF 2 iii                              | comp4705_c0_seq1  | ethylene responsive element binding protein 2                              | K09286   | 6.53           | 229.788      | 15.8435       | 504.83        | 13.158        | 424.674       | 20.447         |
| Sugar metabolism and ethanol formation |                   |                                                                            | KEGG IDs | Harvest (RPKM) | 2d_5t (RPKM) | 2d_12t (RPKM) | 7d_5t1 (RPKM) | 7d_12t (RPKM) | 14d_5t (RPKM) | 14d_12t (RPKM) |
| INV i                                  | comp25883_c0_seq1 | probable galactinol--sucrose galactosyltransferase 2-like                  | K06617   | 2.2145         | 8.1275       | 2.486         | 18.8255       | 2.0035        | 24.883        | 2.878          |
| INV ii                                 | comp18211_c0_seq1 | galacturonosyltransferase 13 isoform 1                                     | K13648   | 5.6765         | 29.0665      | 4.9385        | 22.908        | 3.1955        | 23.7395       | 4.148          |
| INV iii                                | comp18211_c0_seq2 | galacturonosyltransferase 13 isoform 1                                     | K13648   | 9.3055         | 42.9095      | 6.6345        | 35.737        | 4.769         | 31.893        | 6.2385         |
| INV iv                                 | comp24691_c0_seq1 | galactosyltransferase1 isoform partial                                     | K14413   | 2.051          | 6.1885       | 1.6695        | 10.899        | 1.307         | 6.507         | 1.4705         |
| SS                                     | comp18711_c0_seq1 | sucrose synthase                                                           | K00695   | 112.834        | 198.8495     | 40.476        | 129.7985      | 17.441        | 227.258       | 18.018         |
| HK                                     | comp14770_c0_seq1 | PREDICTED: fructokinase-2-like                                             | K00847   | 139.2125       | 278.427      | 60.2295       | 274.2715      | 42.7905       | 155.7655      | 42.9065        |
| pgi                                    | comp16611_c0_seq1 | mannose-6-phosphate type i                                                 | K01809   | 10.1175        | 12.2525      | 7.65          | 35.7295       | 5.541         | 51.589        | 6.5505         |
| scrK                                   | comp14770_c0_seq1 | PREDICTED: fructokinase-2-like                                             | K00847   | 139.2125       | 278.427      | 60.2295       | 274.2715      | 42.7905       | 155.7655      | 42.9065        |
| glgC                                   | comp27454_c0_seq1 | adp glucose pyrophosphorylase large subunit 1 isoform 1                    | K00975   | 1.5885         | 5.1125       | 4.7555        | 5.915         | 4.8595        | 12.1385       | 2.494          |
| pfkA i                                 | comp21147_c0_seq1 | 6-phosphofructokinase 3-like                                               | K00850   | 21.0595        | 130.597      | 21.2415       | 149.5415      | 19.086        | 155.4485      | 15.6465        |
| pfkA ii                                | comp22663_c0_seq1 | phosphofructokinase 3 isoform partial                                      | K00850   | 10.089         | 59.473       | 14.4145       | 74.3625       | 13.8755       | 98.3245       | 13.2885        |
| pfkA iii                               | comp15819_c0_seq1 | 6-phosphofructokinase 3                                                    | K00850   | 60.62          | 241.556      | 57.6365       | 184.9955      | 52.453        | 89.647        | 50.1315        |
| ppp i                                  | comp8557_c0_seq1  | pyrophosphate--fructose 6-phosphate 1-phosphotransferase subunit beta      | K00895   | 10.304         | 20.292       | 5.1025        | 21.37         | 6.311         | 34.8585       | 3.9255         |
| ppp ii                                 | comp571_c0_seq1   | pyrophosphate--fructose 6-phosphate 1-phosphotransferase subunit beta-like | K00895   | 3.838          | 7.369        | 3.041         | 7.821         | 2.9635        | 20.197        | 2.489          |
| PK i                                   | comp1246_c0_seq1  | pyruvate cytosolic isozyme-like                                            | K00873   | 2.232          | 8.4655       | 2.7585        | 90.4975       | 2.811         | 117.7385      | 1.6465         |
| PK ii                                  | comp26767_c0_seq1 | pyruvate cytosolic isozyme-like                                            | K00873   | 3.2485         | 8.4305       | 2.8555        | 111.0755      | 4.1185        | 119.304       | 1.6865         |
| pckA i                                 | comp12627_c0_seq1 | phosphoenolpyruvate carboxykinase                                          | K01610   | 140.3815       | 196.8665     | 94.686        | 102.4725      | 68.0885       | 31.528        | 68.111         |
| pckA ii                                | comp7824_c0_seq1  | phosphoenolpyruvate carboxylase-related kinase isoform 2                   | K13412   | 14.273         | 20.9005      | 8.4345        | 17.631        | 8.116         | 4.3555        | 10.541         |
| PDHA i                                 | comp10913_c0_seq1 | pyruvate dehydrogenase e1 component subunit alpha-like                     | K00161   | 18.7885        | 17.3805      | 21.808        | 69.1305       | 33.585        | 196.7225      | 32.9505        |
| PDHA ii                                | comp18860_c0_seq2 | pyruvate dehydrogenase e1 alpha                                            | K00161   | 35.251         | 30.3         | 25.1845       | 56.686        | 20.4085       | 107.956       | 24.662         |
| PDHB                                   | comp18236_c0_seq4 | pyruvate dehydrogenase e1 component subunit beta- mitochondrial-like       | K00162   | 42.2555        | 53.824       | 21.648        | 89.9995       | 18.428        | 63.1045       | 24.8025        |
| PDHC                                   | comp20105_c0_seq1 | pyruvate decarboxylase                                                     | K01568   | 14.5495        | 51.0295      | 48.969        | 44.4375       | 59.607        | 43.43         | 35.3625        |
| CoA ligase                             | comp26869_c0_seq1 | 4-coumarate:coenzyme a ligase                                              | K01904   | 6.219          | 7.5795       | 5.621         | 43.463        | 5.3705        | 8.19          | 8.1705         |
| ALDH                                   | comp20201_c0_seq1 | aldehyde dehydrogenase family 2 member c4-like                             | K03627   | 29.484         | 225.73       | 53.733        | 262.5525      | 57.054        | 251.0615      | 32.1415        |
| ADH5                                   | comp42190_c0_seq1 | alcohol dehydrogenase-like 7-like                                          | K00121   | 0.5595         | 0.2055       | 1.146         | 1.1545        | 1.4245        | 3.9675        | 0.2605         |
